# Supplementary material for: A comprehensive strategy for exploring corrosion in iron-based artefacts through advanced Multiscale X-ray Microscopy
Source: PubMed Central journal article supplement (PMC9005549; doi:10.1038/s41598-022-10151-w), 2022-04-12
Supplement: 41598_2022_10151_MOESM1_ESM.pdf [file 41598_2022_10151_MOESM1_ESM.pdf]

# A comprehensive strategy for exploring corrosion in iron-based artefacts through advanced Multiscale X-ray Microscopy

Martina Bernabale, Flavio Cognigni, Lorenzo Nigro, Marco Rossi, Tilde de Caro, Caterina De Vito

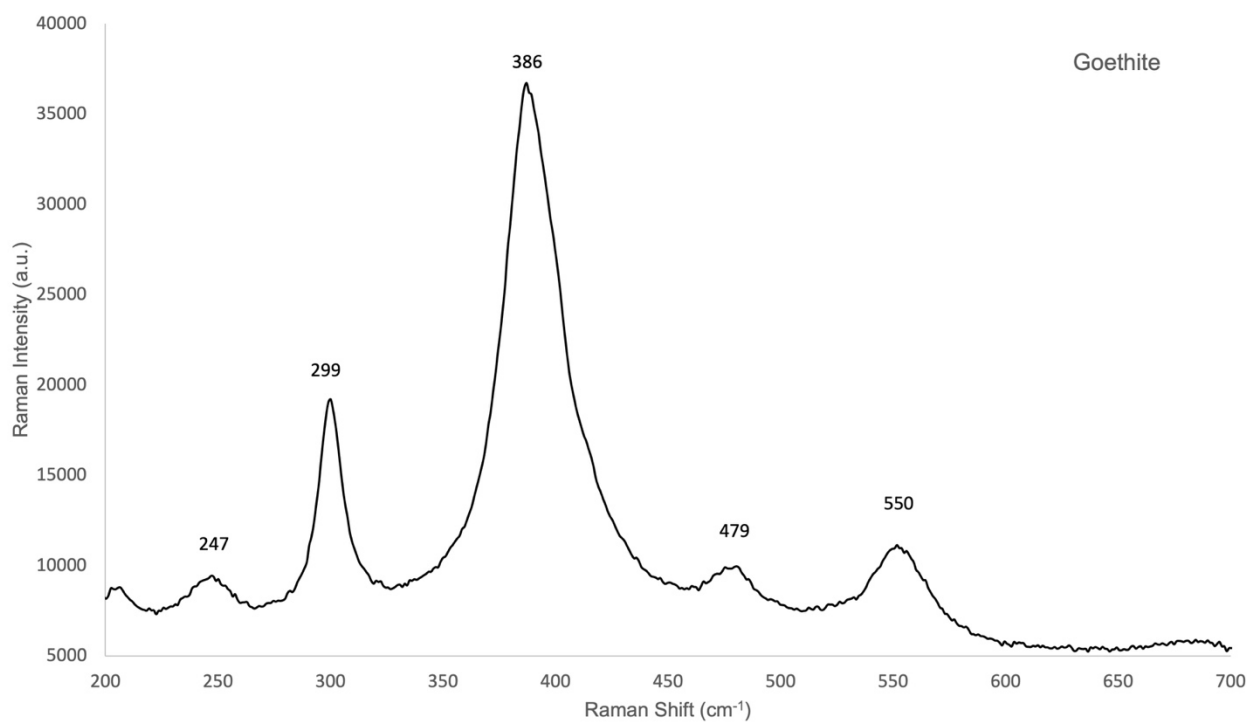

**Supplementary Figure S1. Raman spectrum of corrosion product on nail section. Raman spectrum of goethite in DPL**

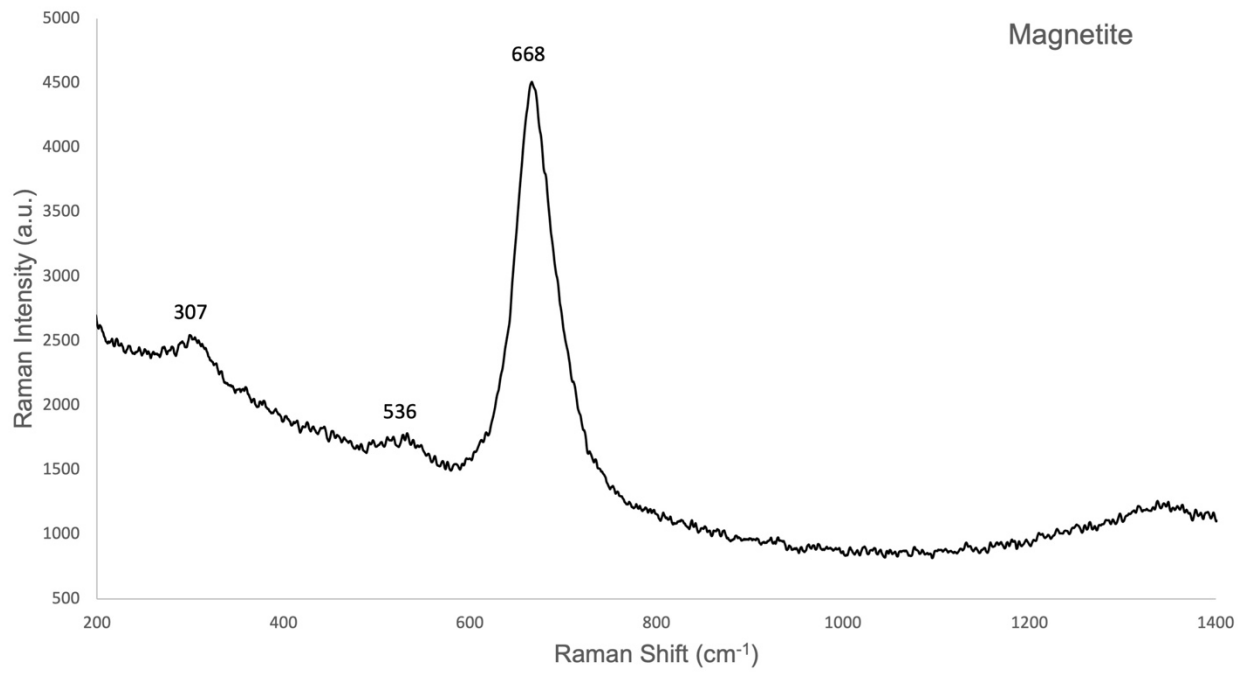

**Supplementary Figure S2. Raman spectrum of corrosion product on nail section. Raman spectrum of magnetite in DPL**

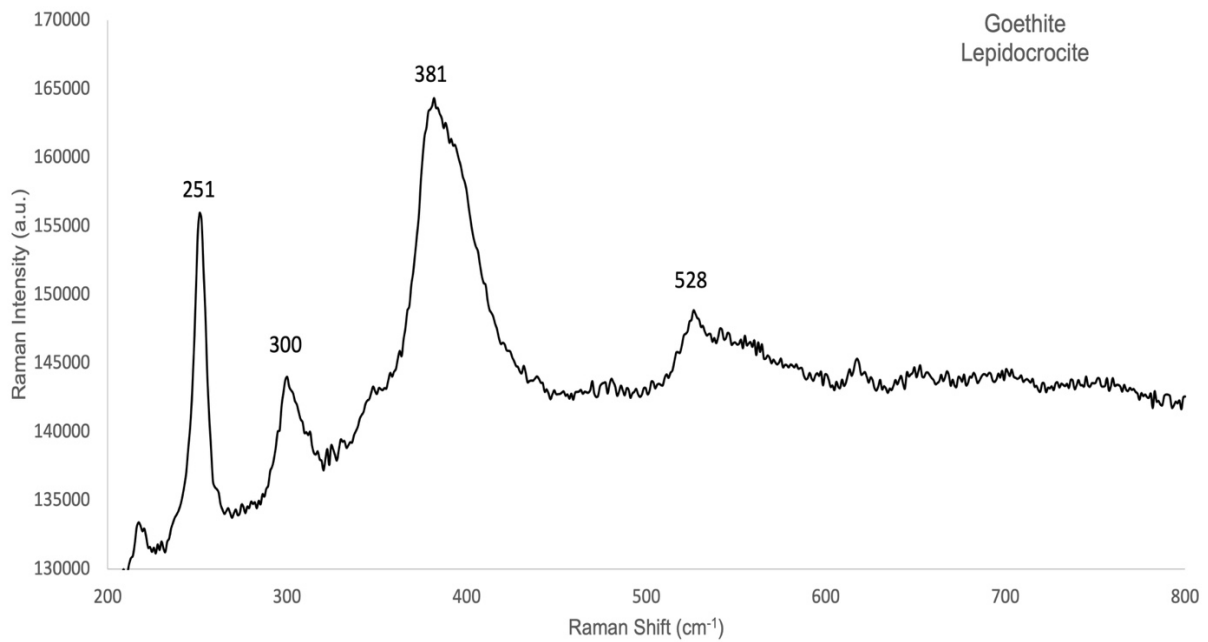

**Supplementary Figure S3. Raman spectrum of corrosion product on nail section.** Raman spectra of goethite and lepidocrocite in TM

**Supplementary Movie S1:** 3D reconstruction of the iron nail *via* low-resolution X-ray scan.

**Supplementary Movie S2:** 3D reconstruction of a selected volume of the iron nail *via* high-resolution X-ray scan.
